# Supplementary material for: SARS-CoV-2 Coronavirus Spike Protein-Induced Apoptosis, Inflammatory, and Oxidative Stress Responses in THP-1-Like-Macrophages: Potential Role of Angiotensin-Converting Enzyme Inhibitor (Perindopril)
Source: PubMed Central journal article supplement (PMC8488399; doi:10.3389/fimmu.2021.728896), 2021-09-20
Supplement: DataSheet_1.pdf [file DataSheet_1.pdf]

## SUPPLEMENTAL MATERIAL

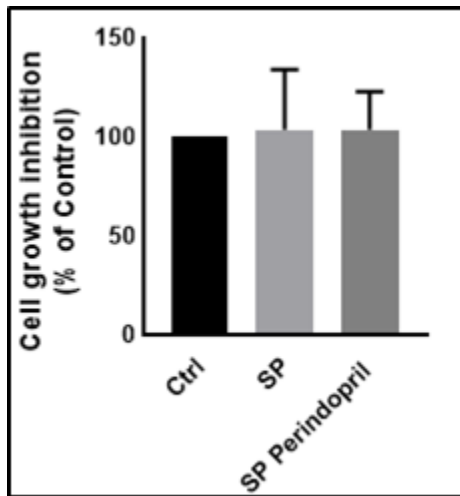

**Figure S1.** Cell viability determination via MTT assay. HUVECs were mock treated (Control), stimulated with S protein (SP) (100 nM) or SP with ACE inhibitor (SP Perindopril, 100  $\mu$ M). Data are presented as mean  $\pm$  SEM, n=3-4.

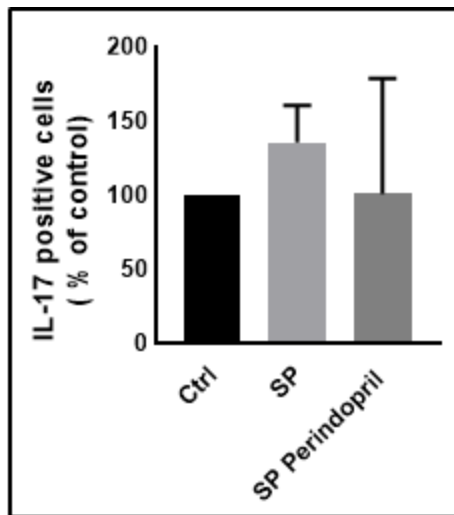

**Figure S2.** PBMCs were mock treated (Ctrl), stimulated with S protein (SP) (100 nM) or SP with ACE inhibitor (SP Perindopril, 100  $\mu$ M). Expression of intracellular IL-17 using flow cytometry analysis. Data are presented as mean  $\pm$  SEM, n=4.

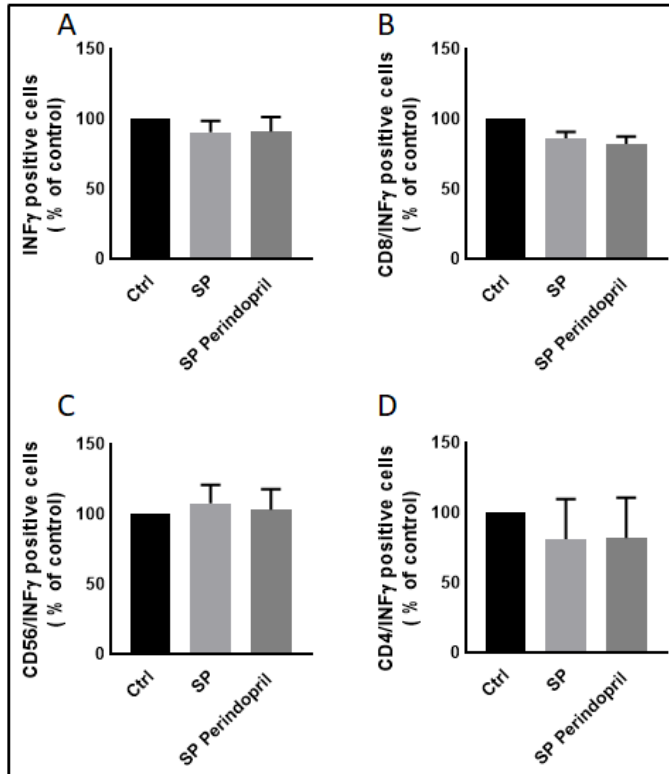

**Figure S3.** PBMCs were mock treated (Ctrl), stimulated with S protein (SP) (100 nM) or SP with ACE inhibitor (SP Perindopril, 100  $\mu$ M). Expression of INF $\gamma$ . **A)** Total PBMCs. **B)** CD8 cytotoxic T cells. **C)** CD56 NK cells. **D)** CD4 T helper cells using flow cytometry analysis. Data are presented as mean  $\pm$  SEM, n=5.

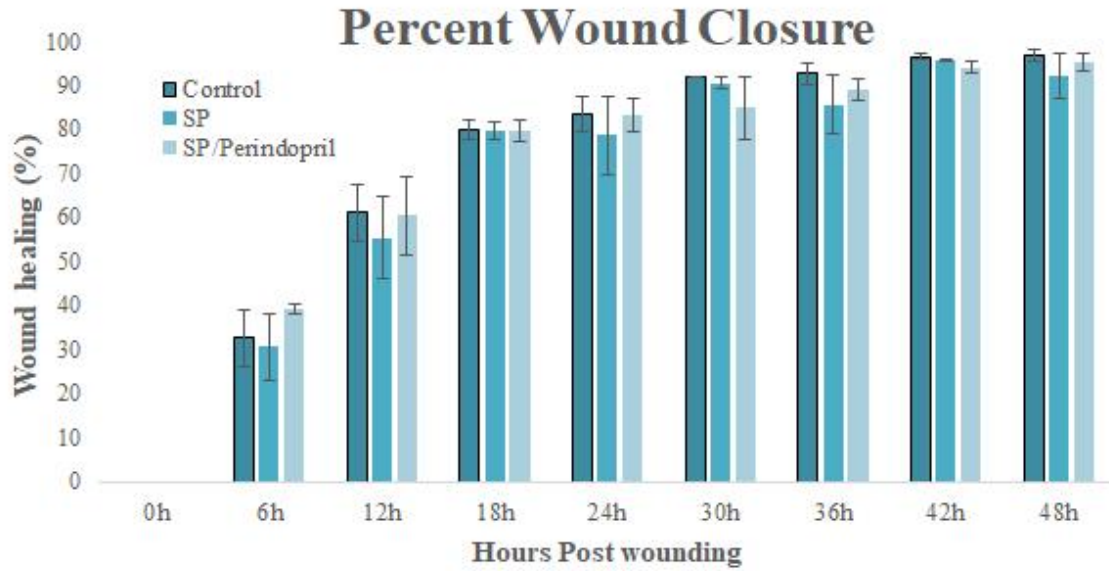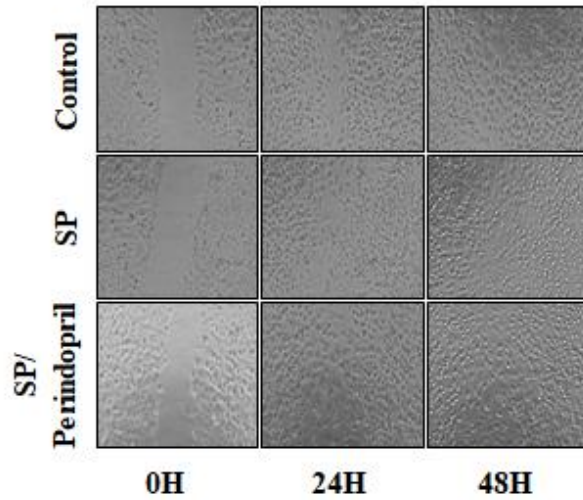

**Figure S4.** HUVECs were mock treated (Control), stimulated with S protein (SP) (100 nM) or SP with ACE inhibitor (SP Perindopril, 100  $\mu$ M). Wound healing assay was performed during 48h. Images were captured every 6 hours for 48 hours using EVOS FL Auto Microscope. Representative images at 0H, 24H and 48H are presented. Data are presented as mean  $\pm$  SEM, n=3-4.

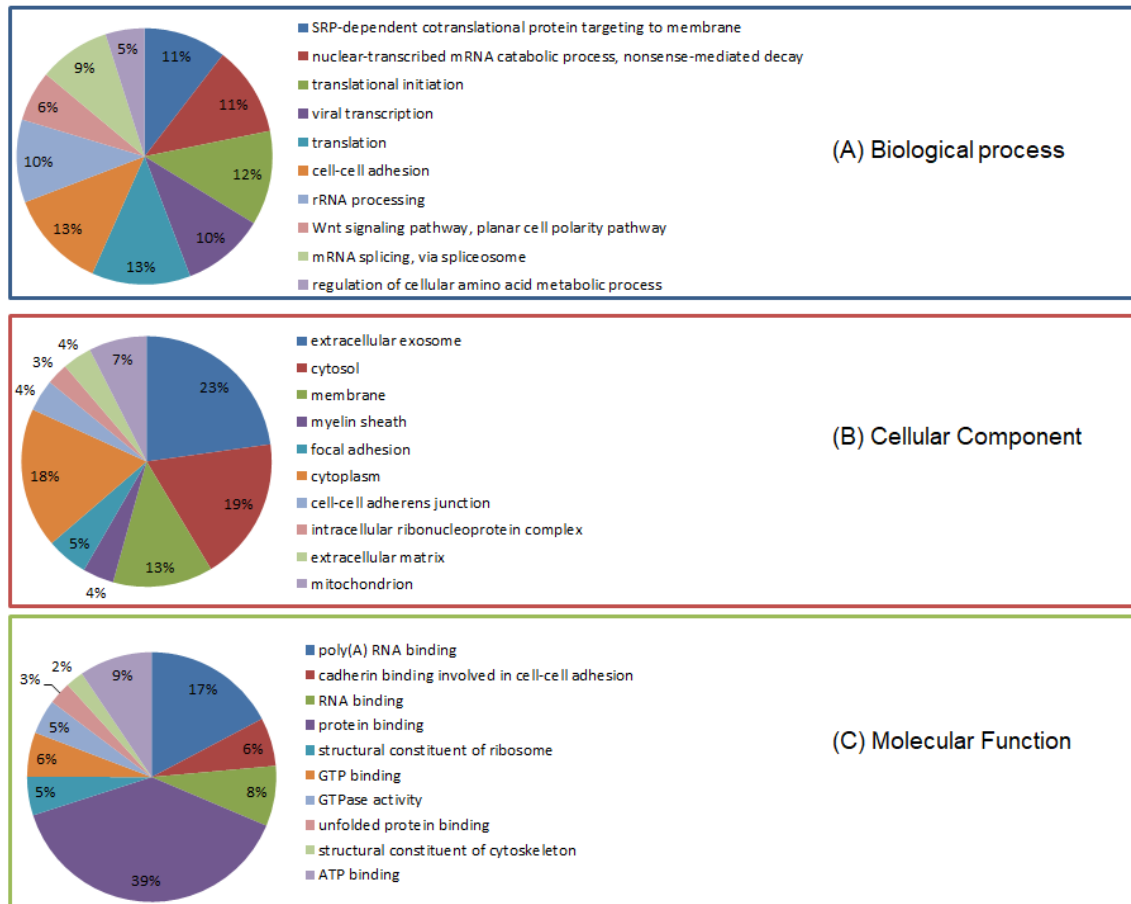

**Figure S5.** GO enrichment analysis of differentially expressed proteins (>1.25 fold or < 0.83 fold) in SP vs. Ctrl using DAVID. (A) Biological process, (B) Cellular Component, and (C) Molecular Function.

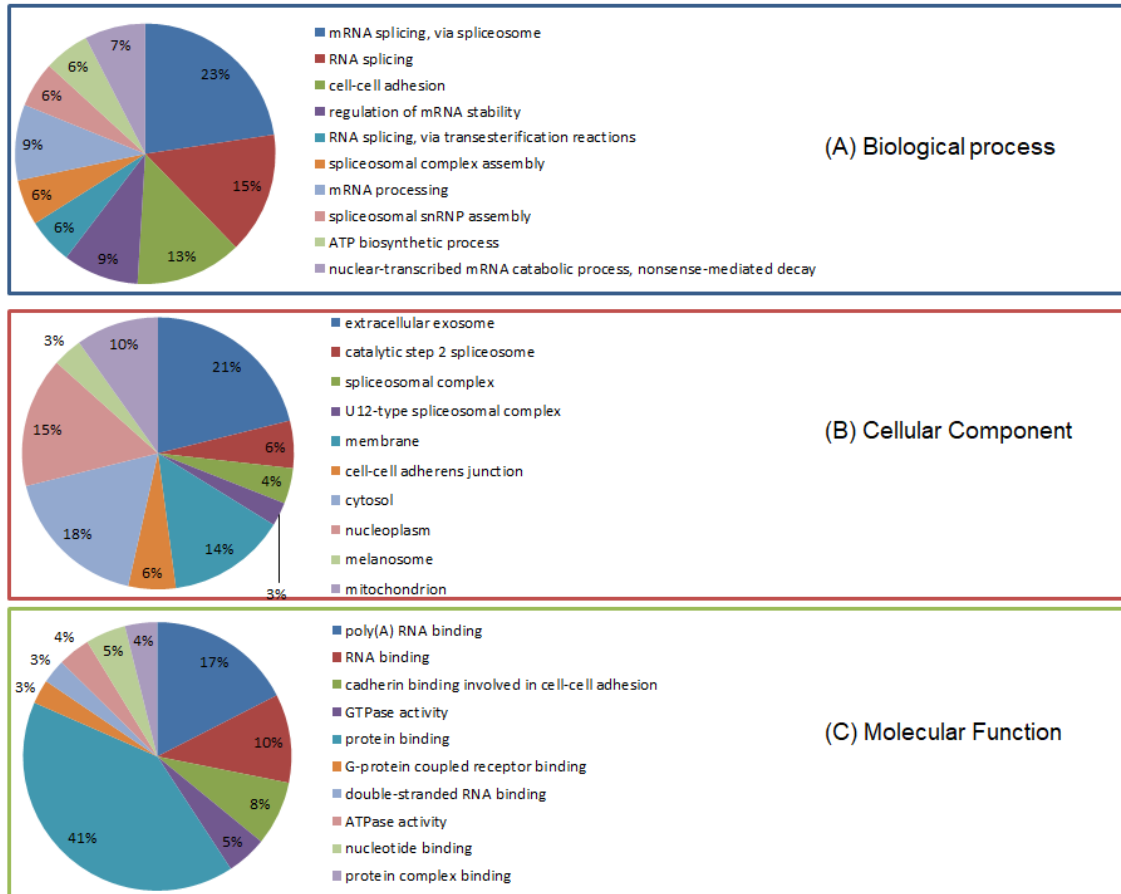

**Figure S6.** GO enrichment analysis of differentially expressed proteins ( $>1.25$  fold or  $< 0.83$  fold) in SP+Perindopril vs. SP using DAVID. (A) Biological process, (B) Cellular Component, and (C) Molecular Function.

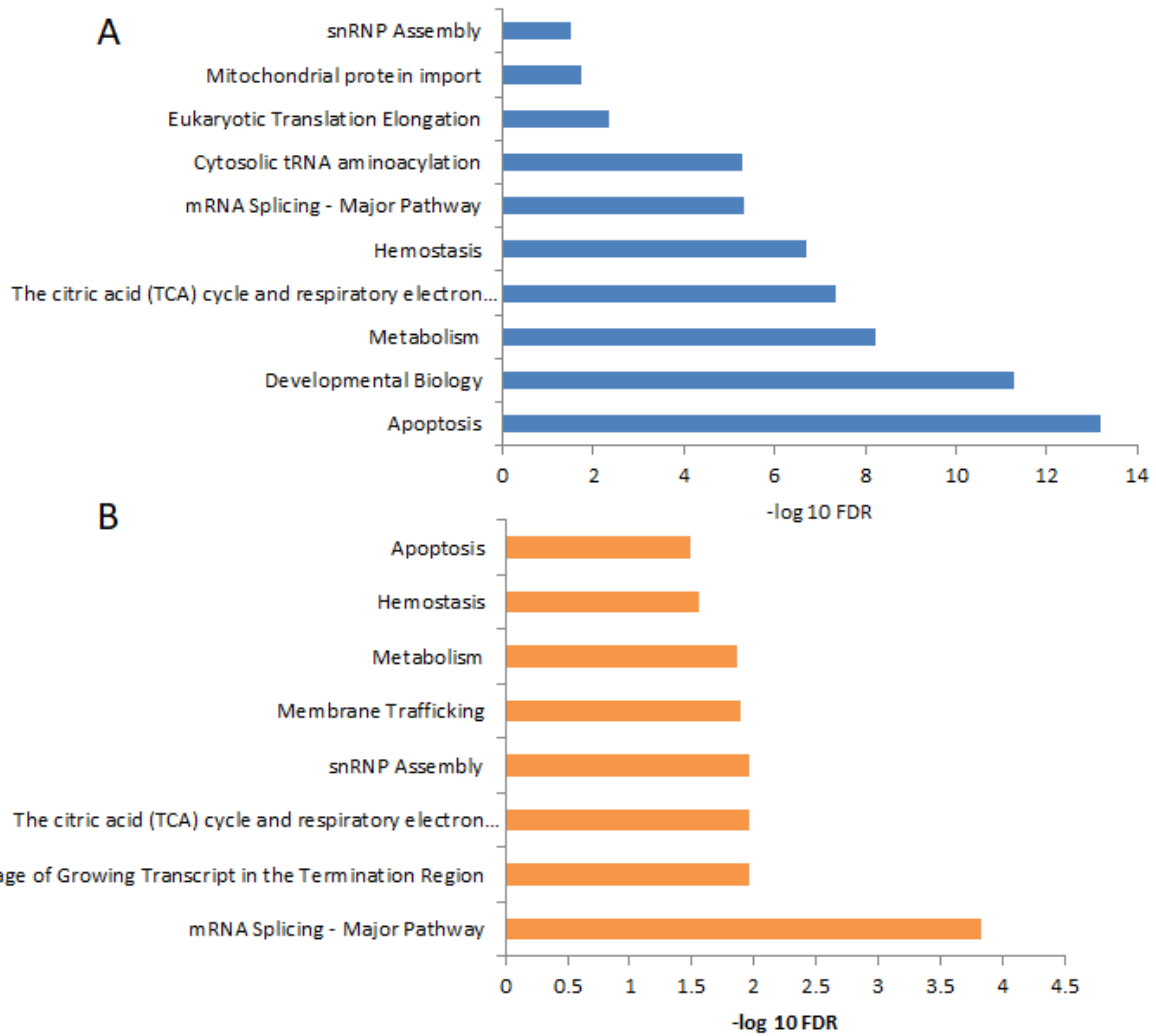

**Figure S7.** Reactome pathway analysis of differentially expressed proteins using STRING. Top Enrichment pathway classes for (A) differentially expressed proteins in SP vs. Ctrl, and (B) differentially expressed proteins in SP+Perindopril vs. SP. The enrichment analysis was set with statistical criteria ( $p < 0.05$ ).

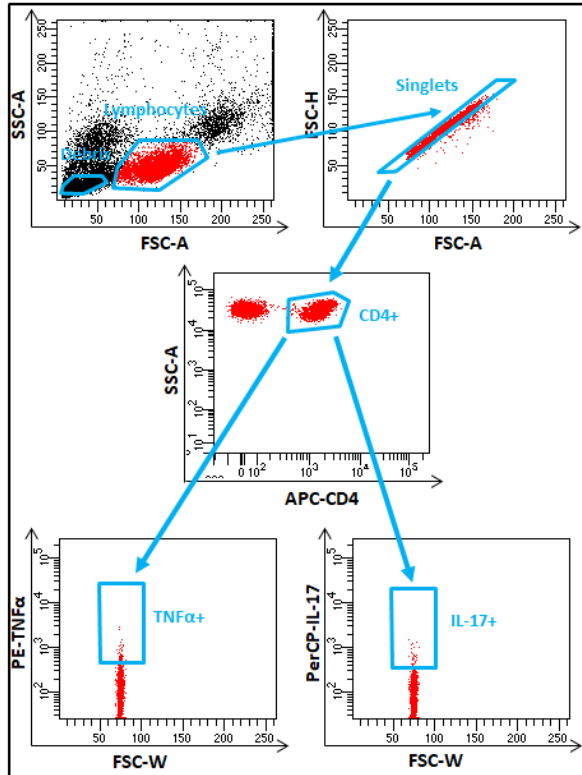

**Figure S8. Gating strategies PBMCs.** After staining with corresponding Abs, cells were analysed by flow cytometry. Fluorophores were respectively excited and analyzed with the appropriate laser and band pass filter (BP). The first gate was applied on the lymphocytes in the side scatter area (SSC-A)/forward scatter area (FSC-A) plot. Singlet population were gated using FSC-H over FSC-A. CD4<sup>+</sup> T cells were gated in the SSC-A/CD4. TNF $\alpha$ <sup>+</sup> and IL-17 T cells were gated in the plot from the CD4<sup>+</sup> cells population.

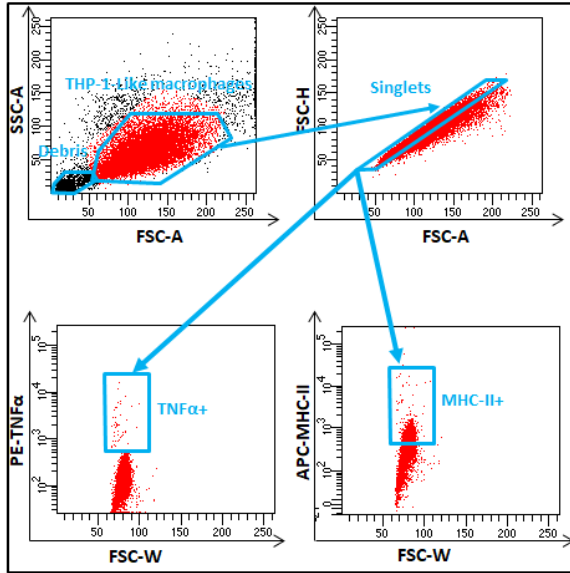

**Figure S9. Gating strategies THP-1-Like macrophages.** After staining with corresponding Abs, cells were analysed by flow cytometry. Fluorophores were respectively excited and analyzed with the appropriate laser and band pass filter (BP). The first gate was applied on the THP-1 like macrophages population after exclusion of debris in the side scatter area (SSC-A)/forward scatter area (FSC-A) plot. Singlet population were gated using FSC-H over FSC-A. TNF $\alpha$ + and MHC-II positive cells were gated in the plot from the singlet cells population.

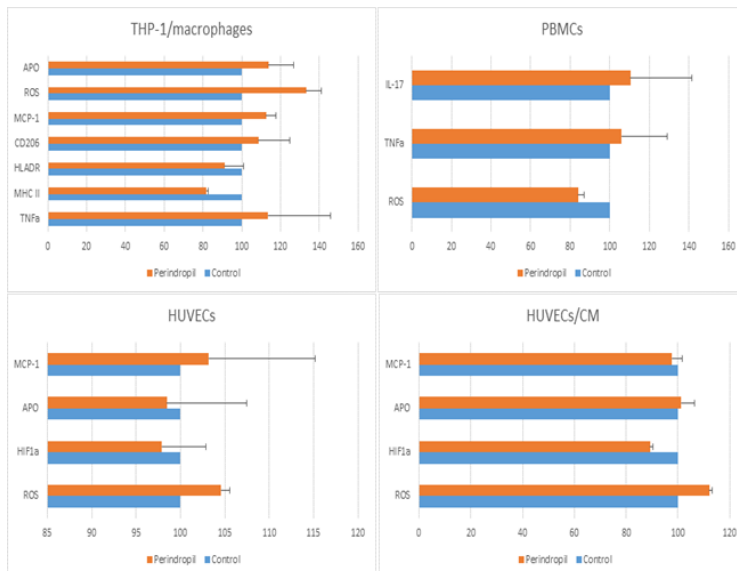

**Figure S10.** Cells were mock treated (Control) or pretreated with ACE inhibitor (Perindopril, 100  $\mu$ M). Apoptosis, ROS, MCP-1, CD206, HLADR, MHCII, IL-17, TNF $\alpha$  and HIF1 $\alpha$  were



evaluated in THP-1 macrophages, PBMCs and HUVECs using flow cytometry analysis. Data are presented as mean  $\pm$  SEM, n=3-4.

**Table S1.**

| <b>Antibodies</b> | <b>Fluorochrome</b> | <b>Clone</b> | <b>Company</b> |
|-------------------|---------------------|--------------|----------------|
| TNF $\alpha$      | PE                  | MAb11        | Biolegend      |
| MHC-II            | APC                 | AF6-120.1    | eBioscience    |
| HLA-DR            | Alexa Fluor 700     | LN3          | eBioscience    |
| CD14              | FITC                | TuK4         | eBioscience    |
| CD206             | PE                  | 685641       | eBioscience    |
| CD4               | APC                 | RM4-5        | eBioscience    |
| TNF $\alpha$      | PE                  | MAb11        | Biolegend      |
| CD4               | PerCP               | MEM-241      | eBioscience    |
| IL-17             | FITC                | eBio17B7     | eBioscience    |
| IL-17             | PerCP               | eBio64DEC17  | eBioscience    |
| INF $\gamma$      | FITC                | 4S.B3        | Biolegend      |
| CD56              | PE-Cyanine7         | CMSSB        | eBioscience    |
| INF $\gamma$      | FITC                | 4S.B3        | Biolegend      |
| CD8               | APC-eFluor 780      | RPA-T8       | eBioscience    |
| INF $\gamma$      | FITC                | 4S.B3        | Biolegend      |
| HIF1 $\alpha$     | PE                  | 546-16       | Biolegend      |

PE, phycoerythrin; APC, allophycocyanin; FITC, Fluorescein.

**Table S2.**

| <b>PROTEIN</b> | <b>P value</b> | <b>Mean of Ctrl</b> | <b>Mean of SP</b> | <b>FC( SP/Ctrl)</b> | <b>Regulation</b> |
|----------------|----------------|---------------------|-------------------|---------------------|-------------------|
|----------------|----------------|---------------------|-------------------|---------------------|-------------------|

|                       |          |         |         |      |      |
|-----------------------|----------|---------|---------|------|------|
| sp P55327 TPD52_HUMAN | 0.020184 | 33450   | 22575   | 0.67 | Down |
| sp O14745 NHRF1_HUMAN | 0.019899 | 41350   | 45900   | 1.11 | Up   |
| sp Q969H8 MYDGF_HUMAN | 0.014596 | 28625   | 32275   | 1.13 | Up   |
| sp P19105 ML12A_HUMAN | 0.025541 | 154500  | 175750  | 1.14 | Up   |
| sp O43399 TPD54_HUMAN | 0.005861 | 26275   | 29975   | 1.14 | Up   |
| sp P25398 RS12_HUMAN  | 0.003909 | 95275   | 108750  | 1.14 | Up   |
| sp P61020 RAB5B_HUMAN | 0.049623 | 47900   | 55200   | 1.15 | Up   |
| sp P32119 PRDX2_HUMAN | 0.002108 | 45350   | 52350   | 1.15 | Up   |
| sp P61604 CH10_HUMAN  | 0.017942 | 648250  | 749500  | 1.16 | Up   |
| sp P49321 NASP_HUMAN  | 0.010446 | 38500   | 44600   | 1.16 | Up   |
| sp P55036 PSMD4_HUMAN | 0.021255 | 26000   | 30200   | 1.16 | Up   |
| sp P37802 TAGL2_HUMAN | 0.030233 | 104350  | 121500  | 1.16 | Up   |
| sp P52566 GDIR2_HUMAN | 0.032515 | 403250  | 470250  | 1.17 | Up   |
| sp Q562R1 ACTBL_HUMAN | 0.001552 | 1955000 | 2280000 | 1.17 | Up   |
| sp Q8NFI4 F10A5_HUMAN | 0.022844 | 39775   | 46425   | 1.17 | Up   |
| sp O15511 ARPC5_HUMAN | 0.028346 | 69925   | 81800   | 1.17 | Up   |
| sp Q92522 H1X_HUMAN   | 0.037917 | 109750  | 128500  | 1.17 | Up   |
| sp P60174 TPIS_HUMAN  | 0.041357 | 89275   | 104625  | 1.17 | Up   |
| sp P28066 PSA5_HUMAN  | 0.027103 | 55100   | 64650   | 1.17 | Up   |
| sp P09211 GSTP1_HUMAN | 0.026809 | 193750  | 228000  | 1.18 | Up   |
| sp Q15102 PA1B3_HUMAN | 0.002871 | 33825   | 39825   | 1.18 | Up   |
| sp P52907 CAZA1_HUMAN | 0.03207  | 55525   | 65375   | 1.18 | Up   |
| sp P26885 FKBP2_HUMAN | 0.021151 | 46900   | 55325   | 1.18 | Up   |
| sp Q9BVC6 TM109_HUMAN | 0.004517 | 68200   | 80475   | 1.18 | Up   |
| sp Q92804 RBP56_HUMAN | 0.024339 | 51050   | 60350   | 1.18 | Up   |
| sp P61204 ARF3_HUMAN  | 0.013868 | 100450  | 118750  | 1.18 | Up   |
| sp P30044 PRDX5_HUMAN | 0.047466 | 81975   | 97175   | 1.19 | Up   |
| sp P62310 LSM3_HUMAN  | 0.02092  | 41025   | 48650   | 1.19 | Up   |
| sp Q9UBT2 SAE2_HUMAN  | 0.026943 | 20425   | 24250   | 1.19 | Up   |
| sp P41252 SYIC_HUMAN  | 0.027028 | 38675   | 45925   | 1.19 | Up   |
| sp P37837 TALDO_HUMAN | 0.033508 | 60125   | 71650   | 1.19 | Up   |
| sp P23528 COF1_HUMAN  | 0.043303 | 260500  | 310500  | 1.19 | Up   |
| sp P31948 STIP1_HUMAN | 0.006464 | 75900   | 90475   | 1.19 | Up   |
| sp P62937 PPIA_HUMAN  | 0.00633  | 538500  | 643000  | 1.19 | Up   |
| sp P35580 MYH10_HUMAN | 0.028695 | 42475   | 50725   | 1.19 | Up   |
| sp P26583 HMGB2_HUMAN | 0.020178 | 35700   | 42650   | 1.19 | Up   |
| sp P18124 RL7_HUMAN   | 0.008773 | 61150   | 73125   | 1.20 | Up   |
| sp P62280 RS11_HUMAN  | 0.034445 | 46725   | 55900   | 1.20 | Up   |
| sp P99999 CYC_HUMAN   | 0.00946  | 50025   | 59875   | 1.20 | Up   |
| sp Q16543 CDC37_HUMAN | 0.049747 | 59100   | 70750   | 1.20 | Up   |
| sp O75223 GGCT_HUMAN  | 0.006951 | 47775   | 57200   | 1.20 | Up   |

|                       |          |         |         |      |    |
|-----------------------|----------|---------|---------|------|----|
| sp P62241 RS8_HUMAN   | 0.036344 | 59600   | 71375   | 1.20 | Up |
| sp P27797 CALR_HUMAN  | 0.017765 | 133750  | 160500  | 1.20 | Up |
| sp P26368 U2AF2_HUMAN | 0.011795 | 69500   | 83425   | 1.20 | Up |
| sp P09651 ROA1_HUMAN  | 0.035686 | 97250   | 116750  | 1.20 | Up |
| sp P62854 RS26_HUMAN  | 0.025021 | 34275   | 41175   | 1.20 | Up |
| sp P62750 RL23A_HUMAN | 0.027329 | 106250  | 127750  | 1.20 | Up |
| sp P62258 1433E_HUMAN | 0.038748 | 94500   | 113750  | 1.20 | Up |
| sp Q9Y536 PAL4A_HUMAN | 0.013425 | 575250  | 692500  | 1.20 | Up |
| sp P14314 GLU2B_HUMAN | 0.011105 | 77125   | 93000   | 1.21 | Up |
| sp P62913 RL11_HUMAN  | 0.037726 | 42150   | 50875   | 1.21 | Up |
| sp O60234 GMFG_HUMAN  | 0.030002 | 83550   | 100900  | 1.21 | Up |
| sp P00813 ADA_HUMAN   | 0.003678 | 92100   | 111250  | 1.21 | Up |
| sp Q15046 SYK_HUMAN   | 0.015992 | 60475   | 73075   | 1.21 | Up |
| sp P61353 RL27_HUMAN  | 0.004243 | 87225   | 105500  | 1.21 | Up |
| sp P25787 PSA2_HUMAN  | 0.020032 | 46950   | 56825   | 1.21 | Up |
| sp Q92945 FUBP2_HUMAN | 0.006003 | 57550   | 69675   | 1.21 | Up |
| sp P11142 HSP7C_HUMAN | 0.00369  | 191750  | 233000  | 1.22 | Up |
| sp P14174 MIF_HUMAN   | 0.003795 | 864500  | 1050500 | 1.22 | Up |
| sp P60660 MYL6_HUMAN  | 0.010441 | 98950   | 120250  | 1.22 | Up |
| sp P31946 1433B_HUMAN | 0.020681 | 60500   | 73525   | 1.22 | Up |
| sp P14618 KPYM_HUMAN  | 0.002509 | 236000  | 287000  | 1.22 | Up |
| sp P15586 GNS_HUMAN   | 0.007947 | 63675   | 77450   | 1.22 | Up |
| sp Q14289 FAK2_HUMAN  | 0.033403 | 18675   | 22725   | 1.22 | Up |
| sp P01893 HLAH_HUMAN  | 0.03425  | 54300   | 66150   | 1.22 | Up |
| sp P63104 1433Z_HUMAN | 0.044443 | 183750  | 224250  | 1.22 | Up |
| sp P16401 H15_HUMAN   | 0.040058 | 141750  | 173000  | 1.22 | Up |
| sp Q15365 PCBP1_HUMAN | 0.007404 | 50100   | 61150   | 1.22 | Up |
| sp P62269 RS18_HUMAN  | 0.003155 | 92825   | 113500  | 1.22 | Up |
| sp P62910 RL32_HUMAN  | 0.044637 | 44700   | 54725   | 1.22 | Up |
| sp Q14103 HNRPD_HUMAN | 0.007299 | 128000  | 156750  | 1.22 | Up |
| sp P18085 ARF4_HUMAN  | 0.039976 | 28675   | 35125   | 1.22 | Up |
| sp P47755 CAZA2_HUMAN | 0.004802 | 251000  | 307750  | 1.23 | Up |
| sp P21399 ACOC_HUMAN  | 0.016599 | 37700   | 46250   | 1.23 | Up |
| sp Q99439 CNN2_HUMAN  | 0.008735 | 54625   | 67025   | 1.23 | Up |
| sp Q13435 SF3B2_HUMAN | 0.048138 | 29500   | 36275   | 1.23 | Up |
| sp P25789 PSA4_HUMAN  | 0.010217 | 60400   | 74275   | 1.23 | Up |
| sp P63261 ACTG_HUMAN  | 0.019363 | 1185000 | 1457500 | 1.23 | Up |
| sp Q16555 DPYL2_HUMAN | 0.007176 | 25975   | 31975   | 1.23 | Up |
| sp P35749 MYH11_HUMAN | 0.014015 | 60475   | 74475   | 1.23 | Up |
| sp Q9UMX0 UBQL1_HUMAN | 0.03988  | 27825   | 34275   | 1.23 | Up |
| sp Q7Z406 MYH14_HUMAN | 0.046961 | 51825   | 63850   | 1.23 | Up |

|                       |          |         |         |      |    |
|-----------------------|----------|---------|---------|------|----|
| sp P62979 RS27A_HUMAN | 0.008554 | 39525   | 48700   | 1.23 | Up |
| sp P42766 RL35_HUMAN  | 0.023666 | 38600   | 47575   | 1.23 | Up |
| sp P62736 ACTA_HUMAN  | 0.009313 | 1640000 | 2022500 | 1.23 | Up |
| sp P30040 ERP29_HUMAN | 0.000699 | 79500   | 98225   | 1.24 | Up |
| sp Q13177 PAK2_HUMAN  | 0.012407 | 22575   | 27900   | 1.24 | Up |
| sp O75083 WDR1_HUMAN  | 0.005725 | 66125   | 81725   | 1.24 | Up |
| sp P68363 TBA1B_HUMAN | 0.023302 | 352500  | 435750  | 1.24 | Up |
| sp P47756 CAPZB_HUMAN | 0.007749 | 76875   | 95150   | 1.24 | Up |
| sp P60866 RS20_HUMAN  | 0.036143 | 38250   | 47350   | 1.24 | Up |
| sp P38646 GRP75_HUMAN | 0.000432 | 47925   | 59375   | 1.24 | Up |
| sp Q13094 LCP2_HUMAN  | 0.000655 | 43350   | 53725   | 1.24 | Up |
| sp P12004 PCNA_HUMAN  | 0.014974 | 38100   | 47250   | 1.24 | Up |
| sp P49755 TMEDA_HUMAN | 0.013991 | 42000   | 52100   | 1.24 | Up |
| sp P16402 H13_HUMAN   | 0.004055 | 109725  | 136250  | 1.24 | Up |
| sp Q96KP4 CNDP2_HUMAN | 0.004715 | 34375   | 42725   | 1.24 | Up |
| sp P13693 TCTP_HUMAN  | 0.02907  | 77225   | 96000   | 1.24 | Up |
| sp P0CG47 UBB_HUMAN   | 0.033423 | 71625   | 89050   | 1.24 | Up |
| sp Q16777 H2A2C_HUMAN | 0.018497 | 325250  | 404500  | 1.24 | Up |
| sp P30041 PRDX6_HUMAN | 0.039182 | 51000   | 63450   | 1.24 | Up |
| sp P30626 SORCN_HUMAN | 0.040951 | 40400   | 50275   | 1.24 | Up |
| sp P08133 ANXA6_HUMAN | 0.002929 | 87775   | 109250  | 1.24 | Up |
| sp Q14141 SEPT6_HUMAN | 0.003217 | 42825   | 53325   | 1.25 | Up |
| sp P00390 GSHR_HUMAN  | 0.045823 | 46725   | 58200   | 1.25 | Up |
| sp Q5JQF8 PAP1M_HUMAN | 0.04128  | 47950   | 59750   | 1.25 | Up |
| sp O43707 ACTN4_HUMAN | 0.009189 | 28725   | 35825   | 1.25 | Up |
| sp Q14240 IF4A2_HUMAN | 0.002425 | 81250   | 101350  | 1.25 | Up |
| sp Q06830 PRDX1_HUMAN | 0.001754 | 826250  | 1031000 | 1.25 | Up |
| sp P00558 PGK1_HUMAN  | 0.001543 | 230000  | 287000  | 1.25 | Up |
| sp P05141 ADT2_HUMAN  | 0.008095 | 80900   | 101050  | 1.25 | Up |
| sp P06733 ENOA_HUMAN  | 0.013236 | 220750  | 275750  | 1.25 | Up |
| sp Q13813 SPTN1_HUMAN | 0.020835 | 48150   | 60150   | 1.25 | Up |
| sp O60831 PRAF2_HUMAN | 0.007829 | 42200   | 52750   | 1.25 | Up |
| sp Q9BUJ2 HNRL1_HUMAN | 0.021634 | 22450   | 28075   | 1.25 | Up |
| sp P61106 RAB14_HUMAN | 0.000799 | 66300   | 82925   | 1.25 | Up |
| sp O60610 DIAP1_HUMAN | 0.018176 | 42250   | 52850   | 1.25 | Up |
| sp P14550 AK1A1_HUMAN | 0.008177 | 48825   | 61075   | 1.25 | Up |
| sp Q99638 RAD9A_HUMAN | 0.026288 | 33150   | 41475   | 1.25 | Up |
| sp Q04917 1433F_HUMAN | 0.013553 | 31075   | 38925   | 1.25 | Up |
| sp Q5TZA2 CROCC_HUMAN | 0.001182 | 36800   | 46100   | 1.25 | Up |
| sp P07195 LDHB_HUMAN  | 0.003752 | 188750  | 236500  | 1.25 | Up |
| sp Q15631 TSN_HUMAN   | 0.002214 | 30400   | 38100   | 1.25 | Up |

|                       |          |        |        |      |    |
|-----------------------|----------|--------|--------|------|----|
| sp P57088 TMM33_HUMAN | 0.022818 | 29450  | 36925  | 1.25 | Up |
| sp P68104 EF1A1_HUMAN | 0.001142 | 285500 | 358000 | 1.25 | Up |
| sp Q15181 IPYR_HUMAN  | 0.000462 | 70250  | 88150  | 1.25 | Up |
| sp P35579 MYH9_HUMAN  | 0.002023 | 66050  | 82900  | 1.26 | Up |
| sp P24666 PPAC_HUMAN  | 0.003366 | 66000  | 82850  | 1.26 | Up |
| sp O14818 PSA7_HUMAN  | 0.044394 | 48550  | 60975  | 1.26 | Up |
| sp Q8IYT4 KATL2_HUMAN | 0.000463 | 147250 | 185000 | 1.26 | Up |
| sp Q15907 RB11B_HUMAN | 0.00025  | 25625  | 32200  | 1.26 | Up |
| sp P34932 HSP74_HUMAN | 0.002554 | 46250  | 58125  | 1.26 | Up |
| sp P50991 TCPD_HUMAN  | 0.00942  | 52050  | 65425  | 1.26 | Up |
| sp P61077 UB2D3_HUMAN | 0.00095  | 37925  | 47700  | 1.26 | Up |
| sp P63000 RAC1_HUMAN  | 0.000068 | 144500 | 181750 | 1.26 | Up |
| sp Q8WYJ6 SEPT1_HUMAN | 0.047524 | 29725  | 37400  | 1.26 | Up |
| sp P13473 LAMP2_HUMAN | 0.006916 | 51775  | 65150  | 1.26 | Up |
| sp Q12931 TRAP1_HUMAN | 0.010954 | 428250 | 539000 | 1.26 | Up |
| sp P55060 XPO2_HUMAN  | 0.000791 | 29575  | 37225  | 1.26 | Up |
| sp P51665 PSMD7_HUMAN | 0.00981  | 33150  | 41725  | 1.26 | Up |
| sp Q13509 TBB3_HUMAN  | 0.00254  | 473500 | 596250 | 1.26 | Up |
| sp P04406 G3P_HUMAN   | 0.042563 | 595250 | 749750 | 1.26 | Up |
| sp P26038 MOES_HUMAN  | 0.003357 | 149250 | 188000 | 1.26 | Up |
| sp Q9Y2B0 CNPY2_HUMAN | 0.034199 | 51850  | 65325  | 1.26 | Up |
| sp O15533 TPSN_HUMAN  | 0.040079 | 36150  | 45550  | 1.26 | Up |
| sp P46776 RL27A_HUMAN | 0.043189 | 66975  | 84450  | 1.26 | Up |
| sp Q7KZF4 SND1_HUMAN  | 0.014355 | 28250  | 35650  | 1.26 | Up |
| sp P22392 NDKB_HUMAN  | 0.005942 | 114900 | 145000 | 1.26 | Up |
| sp O14979 HNRDL_HUMAN | 0.008302 | 172250 | 217500 | 1.26 | Up |
| sp P05455 LA_HUMAN    | 0.015547 | 21500  | 27150  | 1.26 | Up |
| sp P12956 XRCC6_HUMAN | 0.001345 | 71700  | 90550  | 1.26 | Up |
| sp P54136 SYRC_HUMAN  | 0.000212 | 59525  | 75175  | 1.26 | Up |
| sp P31939 PUR9_HUMAN  | 0.01596  | 41200  | 52050  | 1.26 | Up |
| sp Q01844 EWS_HUMAN   | 0.030613 | 25525  | 32250  | 1.26 | Up |
| sp P48643 TCPE_HUMAN  | 0.003935 | 52650  | 66525  | 1.26 | Up |
| sp P08590 MYL3_HUMAN  | 0.032129 | 40925  | 51750  | 1.26 | Up |
| sp Q9UHX1 PUF60_HUMAN | 0.002893 | 16700  | 21125  | 1.26 | Up |
| sp P59998 ARPC4_HUMAN | 0.033217 | 59300  | 75025  | 1.27 | Up |
| sp Q86UX7 URP2_HUMAN  | 0.003292 | 36650  | 46375  | 1.27 | Up |
| sp P78417 GSTO1_HUMAN | 0.001175 | 68075  | 86150  | 1.27 | Up |
| sp P68371 TBB4B_HUMAN | 0.002926 | 108825 | 137750 | 1.27 | Up |
| sp P62306 RUXF_HUMAN  | 0.003699 | 38925  | 49275  | 1.27 | Up |
| sp Q5JXB2 UE2NL_HUMAN | 0.018203 | 51500  | 65225  | 1.27 | Up |
| sp P52597 HNRPF_HUMAN | 0.003044 | 66800  | 84650  | 1.27 | Up |

|                       |          |         |         |      |    |
|-----------------------|----------|---------|---------|------|----|
| sp P54652 HSP72_HUMAN | 0.002051 | 314250  | 398250  | 1.27 | Up |
| sp Q96AE4 FUBP1_HUMAN | 0.00903  | 58850   | 74600   | 1.27 | Up |
| sp P55072 TERA_HUMAN  | 0.000983 | 72800   | 92300   | 1.27 | Up |
| sp P15311 EZRI_HUMAN  | 0.000763 | 46250   | 58650   | 1.27 | Up |
| sp P04075 ALDOA_HUMAN | 0.002053 | 131750  | 167250  | 1.27 | Up |
| sp P61247 RS3A_HUMAN  | 0.005861 | 68000   | 86400   | 1.27 | Up |
| sp P62888 RL30_HUMAN  | 0.005457 | 51125   | 64975   | 1.27 | Up |
| sp P50213 IDH3A_HUMAN | 0.045355 | 40225   | 51150   | 1.27 | Up |
| sp P14324 FPPS_HUMAN  | 0.012718 | 50350   | 64075   | 1.27 | Up |
| sp P46940 IQGA1_HUMAN | 0.003264 | 33350   | 42450   | 1.27 | Up |
| sp Q12905 ILF2_HUMAN  | 0.001692 | 37925   | 48275   | 1.27 | Up |
| sp P42677 RS27_HUMAN  | 0.022907 | 39275   | 50000   | 1.27 | Up |
| sp P62826 RAN_HUMAN   | 0.004213 | 208500  | 265750  | 1.27 | Up |
| sp Q07020 RL18_HUMAN  | 0.003375 | 187250  | 238750  | 1.28 | Up |
| sp Q92598 HS105_HUMAN | 0.004021 | 41875   | 53400   | 1.28 | Up |
| sp P17174 AATC_HUMAN  | 0.001356 | 23575   | 30075   | 1.28 | Up |
| sp P07437 TBB5_HUMAN  | 0.003887 | 373500  | 476500  | 1.28 | Up |
| sp P08238 HS90B_HUMAN | 0.006775 | 354250  | 452000  | 1.28 | Up |
| sp P11021 BIP_HUMAN   | 0.002685 | 97375   | 124250  | 1.28 | Up |
| sp P35637 FUS_HUMAN   | 0.032053 | 51175   | 65300   | 1.28 | Up |
| sp Q13162 PRDX4_HUMAN | 0.000563 | 33775   | 43125   | 1.28 | Up |
| sp P78371 TCPB_HUMAN  | 0.031899 | 68175   | 87050   | 1.28 | Up |
| sp P13796 PLSL_HUMAN  | 0.003466 | 191000  | 244000  | 1.28 | Up |
| sp Q9NQH7 XPP3_HUMAN  | 0.004018 | 204500  | 261250  | 1.28 | Up |
| sp P21333 FLNA_HUMAN  | 0.000067 | 26125   | 33375   | 1.28 | Up |
| sp P18621 RL17_HUMAN  | 0.022341 | 1135000 | 1450000 | 1.28 | Up |
| sp P13010 XRCC5_HUMAN | 0.002627 | 90200   | 115250  | 1.28 | Up |
| sp P61224 RAP1B_HUMAN | 0.023074 | 48750   | 62325   | 1.28 | Up |
| sp Q71U36 TBA1A_HUMAN | 0.016567 | 87200   | 111500  | 1.28 | Up |
| sp P31146 COR1A_HUMAN | 0.002363 | 232250  | 297000  | 1.28 | Up |
| sp O00299 CLIC1_HUMAN | 0.026669 | 99300   | 127000  | 1.28 | Up |
| sp Q9HB71 CYBP_HUMAN  | 0.002743 | 66075   | 84600   | 1.28 | Up |
| sp P27695 APEX1_HUMAN | 0.00012  | 65950   | 84450   | 1.28 | Up |
| sp P30050 RL12_HUMAN  | 0.000442 | 53500   | 68525   | 1.28 | Up |
| sp P40121 CAPG_HUMAN  | 0.00675  | 47650   | 61075   | 1.28 | Up |
| sp O43776 SYNC_HUMAN  | 0.000618 | 31550   | 40450   | 1.28 | Up |
| sp P28072 PSB6_HUMAN  | 0.004021 | 52275   | 67025   | 1.28 | Up |
| sp P49773 HINT1_HUMAN | 0.009119 | 23250   | 29825   | 1.28 | Up |
| sp P13639 EF2_HUMAN   | 0.004314 | 82675   | 106075  | 1.28 | Up |
| sp P62701 RS4X_HUMAN  | 0.018441 | 49000   | 62875   | 1.28 | Up |
| sp Q00839 HNRPU_HUMAN | 0.026984 | 68125   | 87450   | 1.28 | Up |

|                       |          |        |        |      |    |
|-----------------------|----------|--------|--------|------|----|
| sp Q06323 PSME1_HUMAN | 0.006073 | 66050  | 84825  | 1.28 | Up |
| sp Q15233 NONO_HUMAN  | 0.031465 | 51450  | 66075  | 1.28 | Up |
| sp Q12874 SF3A3_HUMAN | 0.012181 | 28900  | 37125  | 1.28 | Up |
| sp P11413 G6PD_HUMAN  | 0.004484 | 60300  | 77475  | 1.28 | Up |
| sp P46926 GNPI1_HUMAN | 0.006819 | 45100  | 57950  | 1.28 | Up |
| sp P15259 PGAM2_HUMAN | 0.000667 | 141250 | 181500 | 1.28 | Up |
| sp P62834 RAP1A_HUMAN | 0.017743 | 48175  | 61925  | 1.29 | Up |
| sp P60953 CDC42_HUMAN | 0.017019 | 87275  | 112250 | 1.29 | Up |
| sp P36578 RL4_HUMAN   | 0.015913 | 54650  | 70325  | 1.29 | Up |
| sp P22314 UBA1_HUMAN  | 0.001872 | 60475  | 77875  | 1.29 | Up |
| sp P07741 APT_HUMAN   | 0.010178 | 58725  | 75675  | 1.29 | Up |
| sp P07900 HS90A_HUMAN | 0.006409 | 140000 | 180500 | 1.29 | Up |
| sp Q9BZV1 UBXN6_HUMAN | 0.033751 | 32100  | 41450  | 1.29 | Up |
| sp O75822 EIF3J_HUMAN | 0.016186 | 86200  | 111325 | 1.29 | Up |
| sp P09972 ALDOC_HUMAN | 0.002452 | 70500  | 91050  | 1.29 | Up |
| sp P22234 PUR6_HUMAN  | 0.005389 | 62750  | 81050  | 1.29 | Up |
| sp Q5BJF6 ODFP2_HUMAN | 0.041616 | 34275  | 44275  | 1.29 | Up |
| sp P34897 GLYM_HUMAN  | 0.001409 | 54125  | 69925  | 1.29 | Up |
| sp O75874 IDHC_HUMAN  | 0.03841  | 39175  | 50625  | 1.29 | Up |
| sp P62316 SMD2_HUMAN  | 0.001086 | 30475  | 39425  | 1.29 | Up |
| sp O00231 PSD11_HUMAN | 0.000119 | 42275  | 54700  | 1.29 | Up |
| sp P50990 TCPQ_HUMAN  | 0.000122 | 95425  | 123500 | 1.29 | Up |
| sp P52209 6PGD_HUMAN  | 0.001153 | 64475  | 83525  | 1.30 | Up |
| sp P61978 HNRPK_HUMAN | 0.000727 | 84700  | 109750 | 1.30 | Up |
| sp P09622 DLDH_HUMAN  | 0.009371 | 37875  | 49100  | 1.30 | Up |
| sp P08865 RSSA_HUMAN  | 0.002301 | 76275  | 98975  | 1.30 | Up |
| sp P00492 HPRT_HUMAN  | 0.023888 | 37275  | 48375  | 1.30 | Up |
| sp Q9H2U2 IPYR2_HUMAN | 0.007713 | 110350 | 143250 | 1.30 | Up |
| sp P55884 EIF3B_HUMAN | 0.034795 | 54225  | 70400  | 1.30 | Up |
| sp P22307 NLTP_HUMAN  | 0.008648 | 38125  | 49500  | 1.30 | Up |
| sp P56537 IF6_HUMAN   | 0.001752 | 69775  | 90600  | 1.30 | Up |
| sp P08559 ODPA_HUMAN  | 0.016938 | 24925  | 32375  | 1.30 | Up |
| sp Q92930 RAB8B_HUMAN | 0.013683 | 132750 | 172500 | 1.30 | Up |
| sp Q15286 RAB35_HUMAN | 0.013683 | 132750 | 172500 | 1.30 | Up |
| sp P62820 RAB1A_HUMAN | 0.000041 | 78875  | 102500 | 1.30 | Up |
| sp Q9UKA9 PTBP2_HUMAN | 0.004613 | 49075  | 63775  | 1.30 | Up |
| sp P31153 METK2_HUMAN | 0.011578 | 28025  | 36425  | 1.30 | Up |
| sp P49368 TCPG_HUMAN  | 0.002945 | 80500  | 104675 | 1.30 | Up |
| sp P62851 RS25_HUMAN  | 0.007241 | 77900  | 101325 | 1.30 | Up |
| sp P49207 RL34_HUMAN  | 0.000377 | 32150  | 41825  | 1.30 | Up |
| sp P61158 ARP3_HUMAN  | 0.000061 | 48175  | 62675  | 1.30 | Up |

|                       |          |        |        |      |    |
|-----------------------|----------|--------|--------|------|----|
| sp P25786 PSA1_HUMAN  | 0.008604 | 40450  | 52625  | 1.30 | Up |
| sp P60900 PSA6_HUMAN  | 0.00144  | 57375  | 74675  | 1.30 | Up |
| sp P08670 VIME_HUMAN  | 0.001791 | 144250 | 187750 | 1.30 | Up |
| sp P40227 TCPZ_HUMAN  | 0.002392 | 88875  | 115750 | 1.30 | Up |
| sp Q15029 U5S1_HUMAN  | 0.01184  | 108425 | 141250 | 1.30 | Up |
| sp Q14194 DPYL1_HUMAN | 0.031375 | 29775  | 38800  | 1.30 | Up |
| sp P59190 RAB15_HUMAN | 0.001975 | 144000 | 187750 | 1.30 | Up |
| sp P20340 RAB6A_HUMAN | 0.001975 | 144000 | 187750 | 1.30 | Up |
| sp Q9H082 RB33B_HUMAN | 0.001975 | 144000 | 187750 | 1.30 | Up |
| sp Q86V81 THOC4_HUMAN | 0.008853 | 20200  | 26350  | 1.30 | Up |
| sp O75390 CISY_HUMAN  | 0.000135 | 61950  | 80825  | 1.30 | Up |
| sp P56134 ATPK_HUMAN  | 0.005344 | 68325  | 89175  | 1.31 | Up |
| sp P62318 SMD3_HUMAN  | 0.000797 | 105125 | 137250 | 1.31 | Up |
| sp P22626 ROA2_HUMAN  | 0.006737 | 66375  | 86700  | 1.31 | Up |
| sp P12081 SYHC_HUMAN  | 0.009644 | 135000 | 176500 | 1.31 | Up |
| sp P53396 ACLY_HUMAN  | 0.001367 | 44850  | 58650  | 1.31 | Up |
| sp Q9NY33 DPP3_HUMAN  | 0.00658  | 20800  | 27200  | 1.31 | Up |
| sp P61313 RL15_HUMAN  | 0.003806 | 30450  | 39825  | 1.31 | Up |
| sp P36871 PGM1_HUMAN  | 0.045403 | 26700  | 34925  | 1.31 | Up |
| sp Q02543 RL18A_HUMAN | 0.011087 | 37025  | 48450  | 1.31 | Up |
| sp O43175 SERA_HUMAN  | 0.000179 | 29975  | 39225  | 1.31 | Up |
| sp P15153 RAC2_HUMAN  | 0.005935 | 72725  | 95175  | 1.31 | Up |
| sp P19623 SPEE_HUMAN  | 0.042662 | 35200  | 46075  | 1.31 | Up |
| sp Q16181 SEPT7_HUMAN | 0.008633 | 32525  | 42575  | 1.31 | Up |
| sp P30049 ATPD_HUMAN  | 0.042263 | 36200  | 47400  | 1.31 | Up |
| sp Q9Y3I0 RTCB_HUMAN  | 0.015408 | 34500  | 45175  | 1.31 | Up |
| sp Q9UKX3 MYH13_HUMAN | 0.002253 | 35100  | 45975  | 1.31 | Up |
| sp P23368 MAOM_HUMAN  | 0.002966 | 39025  | 51125  | 1.31 | Up |
| sp P62753 RS6_HUMAN   | 0.015135 | 80950  | 106050 | 1.31 | Up |
| sp P40926 MDHM_HUMAN  | 0.000339 | 162250 | 212750 | 1.31 | Up |
| sp P50914 RL14_HUMAN  | 0.015858 | 60925  | 79900  | 1.31 | Up |
| sp P62249 RS16_HUMAN  | 0.000705 | 77350  | 101450 | 1.31 | Up |
| sp P00491 PNPH_HUMAN  | 0.00096  | 122750 | 161000 | 1.31 | Up |
| sp P62273 RS29_HUMAN  | 0.02416  | 31875  | 41825  | 1.31 | Up |
| sp P06744 G6PI_HUMAN  | 0.004229 | 85925  | 112750 | 1.31 | Up |
| sp P55795 HNRH2_HUMAN | 0.001006 | 42100  | 55275  | 1.31 | Up |
| sp P10809 CH60_HUMAN  | 0.00102  | 277000 | 363750 | 1.31 | Up |
| sp Q15084 PDIA6_HUMAN | 0.005028 | 77250  | 101450 | 1.31 | Up |
| sp P30048 PRDX3_HUMAN | 0.000903 | 110000 | 144500 | 1.31 | Up |
| sp P07237 PDIA1_HUMAN | 0.007731 | 71850  | 94450  | 1.31 | Up |
| sp P35241 RADI_HUMAN  | 0.000264 | 265000 | 348500 | 1.32 | Up |



|                       |          |        |        |      |    |
|-----------------------|----------|--------|--------|------|----|
| sp P54727 RD23B_HUMAN | 0.026999 | 39650  | 52150  | 1.32 | Up |
| sp P62244 RS15A_HUMAN | 0.000061 | 36275  | 47725  | 1.32 | Up |
| sp P19087 GNAT2_HUMAN | 0.003232 | 77700  | 102250 | 1.32 | Up |
| sp Q03113 GNA12_HUMAN | 0.003232 | 77700  | 102250 | 1.32 | Up |
| sp P62424 RL7A_HUMAN  | 0.032319 | 49325  | 64925  | 1.32 | Up |
| sp Q01518 CAP1_HUMAN  | 0.000197 | 53750  | 70750  | 1.32 | Up |
| sp P62906 RL10A_HUMAN | 0.000145 | 28925  | 38075  | 1.32 | Up |
| sp P11310 ACADM_HUMAN | 0.018116 | 38075  | 50125  | 1.32 | Up |
| sp P62263 RS14_HUMAN  | 0.009163 | 48475  | 63825  | 1.32 | Up |
| sp P48735 IDHP_HUMAN  | 0.000166 | 50625  | 66700  | 1.32 | Up |
| sp P11940 PABP1_HUMAN | 0.002478 | 39075  | 51500  | 1.32 | Up |
| sp Q6P2Q9 PRP8_HUMAN  | 0.026966 | 11910  | 15700  | 1.32 | Up |
| sp P62917 RL8_HUMAN   | 0.001178 | 19850  | 26175  | 1.32 | Up |
| sp Q9Y4L1 HYOU1_HUMAN | 0.043441 | 25475  | 33600  | 1.32 | Up |
| sp Q9BWD1 THIC_HUMAN  | 0.010884 | 34750  | 45850  | 1.32 | Up |
| sp P39023 RL3_HUMAN   | 0.02404  | 16825  | 22200  | 1.32 | Up |
| sp Q12906 ILF3_HUMAN  | 0.025087 | 25000  | 33000  | 1.32 | Up |
| sp P05023 AT1A1_HUMAN | 0.03313  | 28275  | 37325  | 1.32 | Up |
| sp P62491 RB11A_HUMAN | 0.005842 | 72575  | 95850  | 1.32 | Up |
| sp O15144 ARPC2_HUMAN | 0.005363 | 47375  | 62600  | 1.32 | Up |
| sp P26599 PTBP1_HUMAN | 0.002471 | 40825  | 54000  | 1.32 | Up |
| sp Q13200 PSMD2_HUMAN | 0.002685 | 20575  | 27225  | 1.32 | Up |
| sp P62873 GBB1_HUMAN  | 0.028253 | 39825  | 52700  | 1.32 | Up |
| sp Q15738 NSDHL_HUMAN | 0.008687 | 26350  | 34875  | 1.32 | Up |
| sp P25788 PSA3_HUMAN  | 0.004242 | 74750  | 98950  | 1.32 | Up |
| sp Q01813 PFKAP_HUMAN | 0.003252 | 31500  | 41700  | 1.32 | Up |
| sp P46782 RS5_HUMAN   | 0.007893 | 40575  | 53725  | 1.32 | Up |
| sp P61981 1433G_HUMAN | 0.004224 | 59825  | 79225  | 1.32 | Up |
| sp P49448 DHE4_HUMAN  | 0.004793 | 54075  | 71625  | 1.32 | Up |
| sp P00338 LDHA_HUMAN  | 0.004812 | 267750 | 354750 | 1.32 | Up |
| sp P83881 RL36A_HUMAN | 0.010682 | 25675  | 34025  | 1.33 | Up |
| sp P49411 EFTU_HUMAN  | 0.000729 | 39300  | 52100  | 1.33 | Up |
| sp P30613 KPYR_HUMAN  | 0.001261 | 613250 | 813500 | 1.33 | Up |
| sp Q9UHD8 SEPT9_HUMAN | 0.014223 | 41650  | 55300  | 1.33 | Up |
| sp P04083 ANXA1_HUMAN | 0.000109 | 78875  | 104725 | 1.33 | Up |
| sp P17980 PRS6A_HUMAN | 0.002152 | 34250  | 45475  | 1.33 | Up |
| sp P29401 TKT_HUMAN   | 0.00821  | 59000  | 78350  | 1.33 | Up |
| sp O00154 BACH_HUMAN  | 0.005185 | 49700  | 66000  | 1.33 | Up |
| sp Q16563 SYPL1_HUMAN | 0.010186 | 71100  | 94425  | 1.33 | Up |
| sp P08575 PTPRC_HUMAN | 0.000717 | 63325  | 84150  | 1.33 | Up |
| sp O95861 BPNT1_HUMAN | 0.00636  | 19300  | 25650  | 1.33 | Up |

|                       |          |        |        |      |    |
|-----------------------|----------|--------|--------|------|----|
| sp O75915 PRAF3_HUMAN | 0.03958  | 57025  | 75850  | 1.33 | Up |
| sp P46781 RS9_HUMAN   | 0.000371 | 69175  | 92075  | 1.33 | Up |
| sp P12236 ADT3_HUMAN  | 0.002567 | 144000 | 191750 | 1.33 | Up |
| sp Q9Y3U8 RL36_HUMAN  | 0.01249  | 43200  | 57525  | 1.33 | Up |
| sp O15260 SURF4_HUMAN | 0.009637 | 88400  | 117750 | 1.33 | Up |
| sp P28062 PSB8_HUMAN  | 0.000591 | 43225  | 57600  | 1.33 | Up |
| sp P34896 GLYC_HUMAN  | 0.00788  | 42875  | 57150  | 1.33 | Up |
| sp Q14761 PTCA_HUMAN  | 0.008274 | 35650  | 47525  | 1.33 | Up |
| sp P06576 ATPB_HUMAN  | 0.000396 | 128250 | 171000 | 1.33 | Up |
| sp P08195 4F2_HUMAN   | 0.00001  | 40850  | 54475  | 1.33 | Up |
| sp P07339 CATD_HUMAN  | 0.00112  | 87500  | 116750 | 1.33 | Up |
| sp P61254 RL26_HUMAN  | 0.031748 | 95925  | 128000 | 1.33 | Up |
| sp Q8TAA3 PSMA8_HUMAN | 0.003399 | 58650  | 78325  | 1.34 | Up |
| sp Q9H4E7 DEFI6_HUMAN | 0.002731 | 38300  | 51150  | 1.34 | Up |
| sp P07686 HEXB_HUMAN  | 0.012154 | 34750  | 46425  | 1.34 | Up |
| sp P40925 MDHC_HUMAN  | 0.001898 | 56450  | 75425  | 1.34 | Up |
| sp P04439 HLAA_HUMAN  | 0.000366 | 61300  | 81925  | 1.34 | Up |
| sp Q14697 GANAB_HUMAN | 0.000681 | 34450  | 46050  | 1.34 | Up |
| sp P51991 ROA3_HUMAN  | 0.001801 | 36075  | 48225  | 1.34 | Up |
| sp P49721 PSB2_HUMAN  | 0.000315 | 52050  | 69650  | 1.34 | Up |
| sp P12268 IMDH2_HUMAN | 0.002151 | 48500  | 64925  | 1.34 | Up |
| sp P31943 HNRH1_HUMAN | 0.004487 | 39225  | 52600  | 1.34 | Up |
| sp P20700 LMNB1_HUMAN | 0.033864 | 32100  | 43050  | 1.34 | Up |
| sp P23526 SAHH_HUMAN  | 0.002616 | 43525  | 58400  | 1.34 | Up |
| sp P63096 GNAI1_HUMAN | 0.011376 | 35825  | 48125  | 1.34 | Up |
| sp Q15942 ZYX_HUMAN   | 0.015118 | 21875  | 29425  | 1.35 | Up |
| sp Q9UNM6 PSD13_HUMAN | 0.000172 | 24475  | 32925  | 1.35 | Up |
| sp Q99832 TCPH_HUMAN  | 0.001666 | 64600  | 86950  | 1.35 | Up |
| sp P36542 ATPG_HUMAN  | 0.005307 | 51950  | 69925  | 1.35 | Up |
| sp Q04837 SSBP_HUMAN  | 0.001279 | 24475  | 32975  | 1.35 | Up |
| sp P30153 2AAA_HUMAN  | 0.033852 | 41375  | 55750  | 1.35 | Up |
| sp Q9P258 RCC2_HUMAN  | 0.005907 | 40175  | 54150  | 1.35 | Up |
| sp P62312 LSM6_HUMAN  | 0.000988 | 17100  | 23050  | 1.35 | Up |
| sp P14866 HNRPL_HUMAN | 0.00497  | 26975  | 36375  | 1.35 | Up |
| sp P61586 RHOA_HUMAN  | 0.018369 | 86375  | 116500 | 1.35 | Up |
| sp Q15366 PCBP2_HUMAN | 0.003766 | 71250  | 96175  | 1.35 | Up |
| sp P53621 COPA_HUMAN  | 0.007846 | 22550  | 30450  | 1.35 | Up |
| sp O43324 MCA3_HUMAN  | 0.000474 | 22325  | 30150  | 1.35 | Up |
| sp Q7L1Q6 BZW1_HUMAN  | 0.031533 | 45575  | 61550  | 1.35 | Up |
| sp Q92888 ARHG1_HUMAN | 0.035084 | 20675  | 27925  | 1.35 | Up |
| sp Q16836 HCDH_HUMAN  | 0.037191 | 65850  | 89025  | 1.35 | Up |

|                       |          |        |        |      |    |
|-----------------------|----------|--------|--------|------|----|
| sp P18669 PGAM1_HUMAN | 0.005208 | 69600  | 94125  | 1.35 | Up |
| sp Q3ZCM7 TBB8_HUMAN  | 0.002374 | 291500 | 394250 | 1.35 | Up |
| sp Q58FF3 ENPLL_HUMAN | 0.003139 | 68400  | 92800  | 1.36 | Up |
| sp Q5SSJ5 HP1B3_HUMAN | 0.018811 | 64825  | 87950  | 1.36 | Up |
| sp Q15393 SF3B3_HUMAN | 0.034535 | 29425  | 39925  | 1.36 | Up |
| sp P41250 GARS_HUMAN  | 0.033901 | 29775  | 40400  | 1.36 | Up |
| sp P50395 GDIB_HUMAN  | 0.000431 | 53425  | 72525  | 1.36 | Up |
| sp P23284 PPIB_HUMAN  | 0.004586 | 37425  | 50850  | 1.36 | Up |
| sp P61160 ARP2_HUMAN  | 0.004726 | 63975  | 87000  | 1.36 | Up |
| sp P14625 ENPL_HUMAN  | 0.00507  | 101025 | 137500 | 1.36 | Up |
| sp P12814 ACTN1_HUMAN | 0.000905 | 61000  | 83025  | 1.36 | Up |
| sp Q9UL46 PSME2_HUMAN | 0.021743 | 42175  | 57425  | 1.36 | Up |
| sp P31930 QCR1_HUMAN  | 0.001525 | 33925  | 46200  | 1.36 | Up |
| sp Q14568 HS902_HUMAN | 0.008177 | 245250 | 334000 | 1.36 | Up |
| sp Q13838 DX39B_HUMAN | 0.000016 | 58100  | 79150  | 1.36 | Up |
| sp Q6S8J3 POTEE_HUMAN | 0.001765 | 581000 | 791500 | 1.36 | Up |
| sp P62277 RS13_HUMAN  | 0.006358 | 48500  | 66075  | 1.36 | Up |
| sp P07602 SAP_HUMAN   | 0.007114 | 92825  | 126500 | 1.36 | Up |
| sp P00367 DHE3_HUMAN  | 0.000617 | 32750  | 44675  | 1.36 | Up |
| sp Q14651 PLSI_HUMAN  | 0.004961 | 75150  | 102675 | 1.37 | Up |
| sp P46777 RL5_HUMAN   | 0.00128  | 40925  | 55950  | 1.37 | Up |
| sp Q9HAV0 GBB4_HUMAN  | 0.036688 | 66050  | 90300  | 1.37 | Up |
| sp Q92499 DDX1_HUMAN  | 0.01882  | 28475  | 38950  | 1.37 | Up |
| sp P13667 PDIA4_HUMAN | 0.001343 | 74750  | 102275 | 1.37 | Up |
| sp P51149 RAB7A_HUMAN | 0.000148 | 47100  | 64500  | 1.37 | Up |
| sp Q9Y265 RUVB1_HUMAN | 0.015229 | 44050  | 60325  | 1.37 | Up |
| sp Q99714 HCD2_HUMAN  | 0.000657 | 36325  | 49750  | 1.37 | Up |
| sp Q92841 DDX17_HUMAN | 0.003291 | 37425  | 51275  | 1.37 | Up |
| sp P23396 RS3_HUMAN   | 0.001058 | 79250  | 108675 | 1.37 | Up |
| sp Q02790 FKBP4_HUMAN | 0.013057 | 57950  | 79500  | 1.37 | Up |
| sp P25705 ATPA_HUMAN  | 0.001071 | 111150 | 152500 | 1.37 | Up |
| sp P15880 RS2_HUMAN   | 0.002644 | 47425  | 65125  | 1.37 | Up |
| sp O75533 SF3B1_HUMAN | 0.000161 | 37175  | 51050  | 1.37 | Up |
| sp Q15459 SF3A1_HUMAN | 0.009428 | 37700  | 51775  | 1.37 | Up |
| sp P29218 IMPA1_HUMAN | 0.012578 | 39050  | 53725  | 1.38 | Up |
| sp P17066 HSP76_HUMAN | 0.0068   | 448000 | 616750 | 1.38 | Up |
| sp Q13011 ECH1_HUMAN  | 0.000855 | 62875  | 86750  | 1.38 | Up |
| sp Q8IZL9 CDK20_HUMAN | 0.016403 | 31050  | 42950  | 1.38 | Up |
| sp Q13404 UB2V1_HUMAN | 0.002229 | 66525  | 92075  | 1.38 | Up |
| sp Q9NTK5 OLA1_HUMAN  | 0.008736 | 22175  | 30700  | 1.38 | Up |
| sp Q08043 ACTN3_HUMAN | 0.005276 | 62375  | 86375  | 1.38 | Up |

|                       |          |        |        |      |    |
|-----------------------|----------|--------|--------|------|----|
| sp A6NHL2 TBAL3_HUMAN | 0.0107   | 367250 | 508750 | 1.39 | Up |
| sp P48556 PSMD8_HUMAN | 0.019684 | 32925  | 45625  | 1.39 | Up |
| sp Q6NVV1 R13P3_HUMAN | 0.001105 | 62875  | 87275  | 1.39 | Up |
| sp P61163 ACTZ_HUMAN  | 0.049632 | 65125  | 90400  | 1.39 | Up |
| sp Q9NVJ2 ARL8B_HUMAN | 0.039069 | 39375  | 54675  | 1.39 | Up |
| sp Q8NHW5 RLA0L_HUMAN | 0.00036  | 58625  | 81550  | 1.39 | Up |
| sp Q9H9B4 SFXN1_HUMAN | 0.019787 | 29825  | 41525  | 1.39 | Up |
| sp P15121 ALDR_HUMAN  | 0.038192 | 116850 | 163000 | 1.39 | Up |
| sp P38117 ETFB_HUMAN  | 0.045982 | 25975  | 36250  | 1.40 | Up |
| sp P63244 RACK1_HUMAN | 0.020312 | 110500 | 154250 | 1.40 | Up |
| sp P32969 RL9_HUMAN   | 0.007724 | 56375  | 78750  | 1.40 | Up |
| sp P26641 EF1G_HUMAN  | 0.002077 | 67125  | 94125  | 1.40 | Up |
| sp P62314 SMD1_HUMAN  | 0.005686 | 45850  | 64300  | 1.40 | Up |
| sp P54577 SYYC_HUMAN  | 0.000775 | 16450  | 23100  | 1.40 | Up |
| sp P14868 SYDC_HUMAN  | 0.037338 | 45300  | 63675  | 1.41 | Up |
| sp Q00610 CLH1_HUMAN  | 0.003894 | 36525  | 51350  | 1.41 | Up |
| sp P04899 GNAI2_HUMAN | 0.002889 | 20425  | 28775  | 1.41 | Up |
| sp O15145 ARPC3_HUMAN | 0.034526 | 101500 | 143000 | 1.41 | Up |
| sp O14744 ANM5_HUMAN  | 0.000104 | 42300  | 59625  | 1.41 | Up |
| sp O43684 BUB3_HUMAN  | 0.0014   | 19825  | 27975  | 1.41 | Up |
| sp P48047 ATPO_HUMAN  | 0.000269 | 49500  | 69850  | 1.41 | Up |
| sp P06865 HEXA_HUMAN  | 0.018022 | 32275  | 45550  | 1.41 | Up |
| sp O75964 ATP5L_HUMAN | 0.000152 | 47075  | 66450  | 1.41 | Up |
| sp P09661 RU2A_HUMAN  | 0.000239 | 25600  | 36175  | 1.41 | Up |
| sp P00505 AATM_HUMAN  | 0.045609 | 78450  | 111025 | 1.42 | Up |
| sp P22695 QCR2_HUMAN  | 0.001547 | 48075  | 68075  | 1.42 | Up |
| sp Q9NYU2 UGGG1_HUMAN | 0.032258 | 24650  | 34925  | 1.42 | Up |
| sp Q9NPJ3 ACO13_HUMAN | 0.010647 | 40200  | 57000  | 1.42 | Up |
| sp P12931 SRC_HUMAN   | 0.003111 | 24250  | 34400  | 1.42 | Up |
| sp P02656 APOC3_HUMAN | 0.000071 | 17800  | 25375  | 1.43 | Up |
| sp P00846 ATP6_HUMAN  | 0.012047 | 38475  | 54950  | 1.43 | Up |
| sp Q02878 RL6_HUMAN   | 0.008175 | 56100  | 80150  | 1.43 | Up |
| sp Q9NSD9 SYFB_HUMAN  | 0.002013 | 26950  | 38525  | 1.43 | Up |
| sp Q96HE7 ERO1A_HUMAN | 0.015765 | 20325  | 29125  | 1.43 | Up |
| sp Q00534 CDK6_HUMAN  | 0.003112 | 40675  | 58325  | 1.43 | Up |
| sp P24539 AT5F1_HUMAN | 0.001351 | 19225  | 27625  | 1.44 | Up |
| sp Q9Y4G6 TLN2_HUMAN  | 0.03231  | 59325  | 85300  | 1.44 | Up |
| sp Q08211 DHX9_HUMAN  | 0.008726 | 15850  | 22800  | 1.44 | Up |
| sp P55084 ECHB_HUMAN  | 0.008061 | 20075  | 28900  | 1.44 | Up |
| sp Q9UFN0 NPS3A_HUMAN | 0.006674 | 20625  | 29700  | 1.44 | Up |
| sp P17844 DDX5_HUMAN  | 0.011018 | 22175  | 32075  | 1.45 | Up |

|                       |                |                                   |                   |                                       |                   |
|-----------------------|----------------|-----------------------------------|-------------------|---------------------------------------|-------------------|
| sp P30101 PDIA3_HUMAN | 0.00144        | 75250                             | 109000            | 1.45                                  | Up                |
| sp P43403 ZAP70_HUMAN | 0.000791       | 21825                             | 31625             | 1.45                                  | Up                |
| sp O00151 PDLI1_HUMAN | 0.022387       | 64325                             | 93625             | 1.46                                  | Up                |
| sp P55212 CASP6_HUMAN | 0.006715       | 17875                             | 26050             | 1.46                                  | Up                |
| sp P10768 ESTD_HUMAN  | 0.000173       | 16100                             | 23500             | 1.46                                  | Up                |
| sp P40939 ECHA_HUMAN  | 0.008758       | 23325                             | 34050             | 1.46                                  | Up                |
| sp Q13867 BLMH_HUMAN  | 0.003162       | 36000                             | 52925             | 1.47                                  | Up                |
| sp Q13263 TIF1B_HUMAN | 0.003324       | 26300                             | 38675             | 1.47                                  | Up                |
| sp O15143 ARC1B_HUMAN | 0.000038       | 25650                             | 37800             | 1.47                                  | Up                |
| sp Q9BRG1 VPS25_HUMAN | 0.014642       | 27425                             | 40425             | 1.47                                  | Up                |
| sp P20645 MPRD_HUMAN  | 0.006667       | 27175                             | 40125             | 1.48                                  | Up                |
| sp P48449 ERG7_HUMAN  | 0.031039       | 35250                             | 52050             | 1.48                                  | Up                |
| sp P61326 MGN_HUMAN   | 0.00069        | 16500                             | 24375             | 1.48                                  | Up                |
| sp P0DMV9 HS71B_HUMAN | 0.019727       | 25750                             | 38150             | 1.48                                  | Up                |
| sp P28070 PSB4_HUMAN  | 0.016788       | 102900                            | 153750            | 1.49                                  | Up                |
| sp Q9Y3A6 TMED5_HUMAN | 0.031018       | 50100                             | 75025             | 1.50                                  | Up                |
| sp P07814 SYEP_HUMAN  | 0.021774       | 30025                             | 45125             | 1.50                                  | Up                |
| sp P27701 CD82_HUMAN  | 0.014487       | 52000                             | 78375             | 1.51                                  | Up                |
| sp Q00535 CDK5_HUMAN  | 0.007967       | 36450                             | 55100             | 1.51                                  | Up                |
| sp O00410 IPO5_HUMAN  | 0.014886       | 26550                             | 40825             | 1.54                                  | Up                |
| sp O95399 UTS2_HUMAN  | 0.016233       | 94875                             | 146750            | 1.55                                  | Up                |
| sp P51572 BAP31_HUMAN | 0.012517       | 23625                             | 36650             | 1.55                                  | Up                |
| sp Q13303 KCAB2_HUMAN | 0.021265       | 21175                             | 33000             | 1.56                                  | Up                |
| sp Q96C01 F136A_HUMAN | 0.025          | 14138                             | 22275             | 1.58                                  | Up                |
| sp P42574 CASP3_HUMAN | 0.023601       | 46475                             | 74200             | 1.60                                  | Up                |
| sp P54707 AT12A_HUMAN | 0.01869        | 30100                             | 48200             | 1.60                                  | Up                |
| sp P26640 SYVC_HUMAN  | 0.013437       | 18675                             | 30250             | 1.62                                  | Up                |
| sp P23246 SFPQ_HUMAN  | 0.018717       | 38025                             | 63925             | 1.68                                  | Up                |
| sp P54578 UBP14_HUMAN | 0.027376       | 38375                             | 65025             | 1.69                                  | Up                |
| sp P00387 NB5R3_HUMAN | 0.019486       | 18125                             | 31375             | 1.73                                  | Up                |
| sp O43488 ARK72_HUMAN | 0.003485       | 28750                             | 49775             | 1.73                                  | Up                |
| sp P24752 THIL_HUMAN  | 0.026228       | 52525                             | 91025             | 1.73                                  | Up                |
| sp Q2VIR3 IF2GL_HUMAN | 0.037444       | 40750                             | 72525             | 1.78                                  | Up                |
| sp Q9BXJ9 NAA15_HUMAN | 0.001933       | 18000                             | 34750             | 1.93                                  | Up                |
| sp Q13561 DCTN2_HUMAN | 0.040456       | 20600                             | 41575             | 2.02                                  | Up                |
| sp Q01650 LAT1_HUMAN  | 0.027839       | 14350                             | 29125             | 2.03                                  | Up                |
| sp P09104 ENOG_HUMAN  | 0.019769       | 11458                             | 24775             | 2.16                                  | Up                |
| sp Q9HB07 MYG1_HUMAN  | 0.029104       | 48270                             | 109550            | 2.27                                  | Up                |
| sp Q92974 ARHG2_HUMAN | 0.001286       | 3438                              | 9773              | 2.84                                  | Up                |
| <b>PROTEIN</b>        | <b>P value</b> | <b>Mean of SP<br/>Perindropil</b> | <b>Mean of SP</b> | <b>FC(SP<br/>Perindropil<br/>/SP)</b> | <b>Regulation</b> |

|                       |          |        |        |      |      |
|-----------------------|----------|--------|--------|------|------|
| sp P61088 UBE2N_HUMAN | 0.026203 | 34475  | 66100  | 0.52 | Down |
| sp O43143 DHX15_HUMAN | 0.005172 | 22825  | 40800  | 0.56 | Down |
| sp O75323 NIPS2_HUMAN | 0.022578 | 6963   | 12085  | 0.58 | Down |
| sp P00387 NB5R3_HUMAN | 0.031836 | 19200  | 31375  | 0.61 | Down |
| sp Q9BXJ9 NAA15_HUMAN | 0.016941 | 22400  | 34750  | 0.64 | Down |
| sp Q9BYZ2 LDH6B_HUMAN | 0.027255 | 42750  | 63975  | 0.67 | Down |
| sp Q96C01 F136A_HUMAN | 0.012656 | 14900  | 22275  | 0.67 | Down |
| sp Q00535 CDK5_HUMAN  | 0.012953 | 38075  | 55100  | 0.69 | Down |
| sp P62314 SMD1_HUMAN  | 0.011325 | 44500  | 64300  | 0.69 | Down |
| sp Q9UHG3 PCYOX_HUMAN | 0.008629 | 14500  | 19775  | 0.73 | Down |
| sp O43488 ARK72_HUMAN | 0.009555 | 37000  | 49775  | 0.74 | Down |
| sp P62834 RAP1A_HUMAN | 0.022908 | 46075  | 61925  | 0.74 | Down |
| sp O60664 PLIN3_HUMAN | 0.02677  | 14975  | 19750  | 0.76 | Down |
| sp Q96HE7 ERO1A_HUMAN | 0.028989 | 22125  | 29125  | 0.76 | Down |
| sp P20700 LMNB1_HUMAN | 0.011465 | 32800  | 43050  | 0.76 | Down |
| sp Q6P2Q9 PRP8_HUMAN  | 0.009844 | 11975  | 15700  | 0.76 | Down |
| sp P56134 ATPK_HUMAN  | 0.009355 | 68325  | 89175  | 0.77 | Down |
| sp P07602 SAP_HUMAN   | 0.026199 | 97200  | 126500 | 0.77 | Down |
| sp Q8NHW5 RLA0L_HUMAN | 0.049188 | 63000  | 81550  | 0.77 | Down |
| sp P49721 PSB2_HUMAN  | 0.026338 | 54300  | 69650  | 0.78 | Down |
| sp P31930 QCR1_HUMAN  | 0.015315 | 36200  | 46200  | 0.78 | Down |
| sp O00231 PSD11_HUMAN | 0.016524 | 42975  | 54700  | 0.79 | Down |
| sp Q92930 RAB8B_HUMAN | 0.033879 | 135750 | 172500 | 0.79 | Down |
| sp Q15286 RAB35_HUMAN | 0.033879 | 135750 | 172500 | 0.79 | Down |
| sp P57088 TMM33_HUMAN | 0.032687 | 29100  | 36925  | 0.79 | Down |
| sp Q15738 NSDHL_HUMAN | 0.018936 | 27650  | 34875  | 0.79 | Down |
| sp Q9UKX3 MYH13_HUMAN | 0.041036 | 36550  | 45975  | 0.79 | Down |
| sp Q13838 DX39B_HUMAN | 0.019997 | 63025  | 79150  | 0.80 | Down |
| sp Q16563 SYPL1_HUMAN | 0.01186  | 75350  | 94425  | 0.80 | Down |
| sp O43399 TPD54_HUMAN | 0.042351 | 23925  | 29975  | 0.80 | Down |
| sp P22234 PUR6_HUMAN  | 0.024006 | 64800  | 81050  | 0.80 | Down |
| sp Q15393 SF3B3_HUMAN | 0.012532 | 31925  | 39925  | 0.80 | Down |
| sp O75964 ATP5L_HUMAN | 0.004536 | 53250  | 66450  | 0.80 | Down |
| sp P43403 ZAP70_HUMAN | 0.019209 | 25375  | 31625  | 0.80 | Down |
| sp P51991 ROA3_HUMAN  | 0.010459 | 38700  | 48225  | 0.80 | Down |
| sp A8MWD9 RUXGL_HUMAN | 0.044147 | 35000  | 43575  | 0.80 | Down |
| sp P30153 2AAA_HUMAN  | 0.038786 | 44850  | 55750  | 0.80 | Down |
| sp P02656 APOC3_HUMAN | 0.004278 | 20425  | 25375  | 0.80 | Down |
| sp Q96KP4 CNDP2_HUMAN | 0.016208 | 34475  | 42725  | 0.81 | Down |
| sp Q9UMX0 UBQL1_HUMAN | 0.019156 | 27700  | 34275  | 0.81 | Down |
| sp Q92945 FUBP2_HUMAN | 0.031433 | 56425  | 69675  | 0.81 | Down |

|                       |          |        |        |      |      |
|-----------------------|----------|--------|--------|------|------|
| sp P19087 GNAT2_HUMAN | 0.04139  | 82825  | 102250 | 0.81 | Down |
| sp Q03113 GNA12_HUMAN | 0.04139  | 82825  | 102250 | 0.81 | Down |
| sp P35637 FUS_HUMAN   | 0.036354 | 53100  | 65300  | 0.81 | Down |
| sp P54707 AT12A_HUMAN | 0.025463 | 39350  | 48200  | 0.82 | Down |
| sp P61326 MGN_HUMAN   | 0.03915  | 19900  | 24375  | 0.82 | Down |
| sp P07741 APT_HUMAN   | 0.033908 | 61900  | 75675  | 0.82 | Down |
| sp Q9UKA9 PTBP2_HUMAN | 0.043138 | 52200  | 63775  | 0.82 | Down |
| sp P20645 MPRD_HUMAN  | 0.011058 | 32875  | 40125  | 0.82 | Down |
| sp Q13263 TIF1B_HUMAN | 0.045133 | 31750  | 38675  | 0.82 | Down |
| sp P31153 METK2_HUMAN | 0.049977 | 29925  | 36425  | 0.82 | Down |
| sp P52597 HNRPF_HUMAN | 0.043026 | 69550  | 84650  | 0.82 | Down |
| sp P04083 ANXA1_HUMAN | 0.016374 | 86050  | 104725 | 0.82 | Down |
| sp P08195 4F2_HUMAN   | 0.034611 | 44775  | 54475  | 0.82 | Down |
| sp O75874 IDHC_HUMAN  | 0.000872 | 41675  | 50625  | 0.82 | Down |
| sp P62318 SMD3_HUMAN  | 0.036552 | 113000 | 137250 | 0.82 | Down |
| sp P0DMV9 HS71B_HUMAN | 0.046796 | 31475  | 38150  | 0.83 | Down |
| sp O95433 AHSA1_HUMAN | 0.042249 | 37875  | 45900  | 0.83 | Down |
| sp P61160 ARP2_HUMAN  | 0.041775 | 72075  | 87000  | 0.83 | Down |
| sp Q00610 CLH1_HUMAN  | 0.031672 | 42575  | 51350  | 0.83 | Down |
| sp P11940 PABP1_HUMAN | 0.043652 | 42700  | 51500  | 0.83 | Down |
| sp P15586 GNS_HUMAN   | 0.048381 | 64275  | 77450  | 0.83 | Down |
| sp O14744 ANM5_HUMAN  | 0.027136 | 49525  | 59625  | 0.83 | Down |
| sp P49207 RL34_HUMAN  | 0.010547 | 34750  | 41825  | 0.83 | Down |
| sp P54727 RD23B_HUMAN | 0.013349 | 43575  | 52150  | 0.84 | Down |
| sp P38117 ETFB_HUMAN  | 0.025777 | 30350  | 36250  | 0.84 | Down |
| sp Q9UNM6 PSD13_HUMAN | 0.018704 | 27575  | 32925  | 0.84 | Down |
| sp P59190 RAB15_HUMAN | 0.035502 | 157250 | 187750 | 0.84 | Down |
| sp P20340 RAB6A_HUMAN | 0.035502 | 157250 | 187750 | 0.84 | Down |
| sp Q9H082 RB33B_HUMAN | 0.035502 | 157250 | 187750 | 0.84 | Down |
| sp Q99638 RAD9A_HUMAN | 0.006413 | 34800  | 41475  | 0.84 | Down |
| sp Q13404 UB2V1_HUMAN | 0.047271 | 77300  | 92075  | 0.84 | Down |
| sp Q99832 TCPH_HUMAN  | 0.033126 | 73050  | 86950  | 0.84 | Down |
| sp P23396 RS3_HUMAN   | 0.047687 | 91325  | 108675 | 0.84 | Down |
| sp P61163 ACTZ_HUMAN  | 0.016537 | 76200  | 90400  | 0.84 | Down |
| sp P35241 RADI_HUMAN  | 0.047786 | 294500 | 348500 | 0.85 | Down |
| sp P62312 LSM6_HUMAN  | 0.033512 | 19500  | 23050  | 0.85 | Down |
| sp P22307 NLTP_HUMAN  | 0.048565 | 41900  | 49500  | 0.85 | Down |
| sp O00151 PDLI1_HUMAN | 0.029886 | 79300  | 93625  | 0.85 | Down |
| sp P27695 APEX1_HUMAN | 0.016459 | 71600  | 84450  | 0.85 | Down |
| sp P06744 G6PI_HUMAN  | 0.045021 | 95650  | 112750 | 0.85 | Down |
| sp P34897 GLYM_HUMAN  | 0.036804 | 59425  | 69925  | 0.85 | Down |

|                       |                |                     |                                   |                                         |                   |
|-----------------------|----------------|---------------------|-----------------------------------|-----------------------------------------|-------------------|
| sp P13473 LAMP2_HUMAN | 0.045484       | 55375               | 65150                             | 0.85                                    | Down              |
| sp P42574 CASP3_HUMAN | 0.035233       | 63150               | 74200                             | 0.85                                    | Down              |
| sp P15259 PGAM2_HUMAN | 0.020282       | 154500              | 181500                            | 0.85                                    | Down              |
| sp Q13011 ECH1_HUMAN  | 0.013957       | 73875               | 86750                             | 0.85                                    | Down              |
| sp P61158 ARP3_HUMAN  | 0.045111       | 53500               | 62675                             | 0.85                                    | Down              |
| sp P10809 CH60_HUMAN  | 0.03977        | 310750              | 363750                            | 0.85                                    | Down              |
| sp P26599 PTBP1_HUMAN | 0.044933       | 46150               | 54000                             | 0.85                                    | Down              |
| sp P62316 SMD2_HUMAN  | 0.026411       | 33700               | 39425                             | 0.85                                    | Down              |
| sp P22695 QCR2_HUMAN  | 0.000439       | 58650               | 68075                             | 0.86                                    | Down              |
| sp P40926 MDHM_HUMAN  | 0.027545       | 183500              | 212750                            | 0.86                                    | Down              |
| sp P23526 SAHH_HUMAN  | 0.014139       | 50500               | 58400                             | 0.86                                    | Down              |
| sp P56537 IF6_HUMAN   | 0.033144       | 78600               | 90600                             | 0.87                                    | Down              |
| sp P28062 PSB8_HUMAN  | 0.045977       | 49975               | 57600                             | 0.87                                    | Down              |
| sp P12931 SRC_HUMAN   | 0.041475       | 29850               | 34400                             | 0.87                                    | Down              |
| sp P61204 ARF3_HUMAN  | 0.015619       | 103275              | 118750                            | 0.87                                    | Down              |
| sp P21333 FLNA_HUMAN  | 0.033531       | 29075               | 33375                             | 0.87                                    | Down              |
| sp P61981 1433G_HUMAN | 0.030683       | 69050               | 79225                             | 0.87                                    | Down              |
| sp Q9UI08 EVL_HUMAN   | 0.045528       | 30725               | 35050                             | 0.88                                    | Down              |
| sp P62906 RL10A_HUMAN | 0.044058       | 33525               | 38075                             | 0.88                                    | Down              |
| sp Q07020 RL18_HUMAN  | 0.04986        | 211500              | 238750                            | 0.89                                    | Down              |
| sp P61604 CH10_HUMAN  | 0.025049       | 664250              | 749500                            | 0.89                                    | Down              |
|                       |                |                     |                                   | <b>FC(SP<br/>Perindropil<br/>/Ctrl)</b> |                   |
| <b>PROTEIN</b>        | <b>P value</b> | <b>Mean of Ctrl</b> | <b>Mean of SP<br/>Perindropil</b> |                                         | <b>Regulation</b> |
| sp Q99733 NP1L4_HUMAN | 0.004228       | 47425               | 26475                             | 0.56                                    | Down              |
| sp O43143 DHX15_HUMAN | 0.022877       | 32100               | 22825                             | 0.71                                    | Down              |
| sp Q16531 DDB1_HUMAN  | 0.033183       | 29000               | 22525                             | 0.78                                    | Down              |
| sp P18124 RL7_HUMAN   | 0.041507       | 61150               | 68700                             | 1.12                                    | Up                |
| sp Q13404 UB2V1_HUMAN | 0.038442       | 66525               | 77300                             | 1.16                                    | Up                |
| sp Q13011 ECH1_HUMAN  | 0.041424       | 62875               | 73875                             | 1.17                                    | Up                |
| sp Q58FF3 ENPLL_HUMAN | 0.041367       | 68400               | 80825                             | 1.18                                    | Up                |
| sp P07237 PDIA1_HUMAN | 0.048115       | 71850               | 85150                             | 1.19                                    | Up                |
| sp P49448 DHE4_HUMAN  | 0.046826       | 54075               | 65275                             | 1.21                                    | Up                |
| sp P23368 MAOM_HUMAN  | 0.021259       | 39025               | 47575                             | 1.22                                    | Up                |
| sp P22695 QCR2_HUMAN  | 0.028807       | 48075               | 58650                             | 1.22                                    | Up                |
| sp O43765 SGTA_HUMAN  | 0.00291        | 20925               | 25700                             | 1.23                                    | Up                |
| sp P13667 PDIA4_HUMAN | 0.025407       | 74750               | 92050                             | 1.23                                    | Up                |
| sp P00367 DHE3_HUMAN  | 0.011623       | 32750               | 40675                             | 1.24                                    | Up                |
| sp P10768 ESTD_HUMAN  | 0.029788       | 16100               | 20100                             | 1.25                                    | Up                |
| sp Q04837 SSBP_HUMAN  | 0.0045         | 24475               | 30675                             | 1.25                                    | Up                |
| sp P23284 PPIB_HUMAN  | 0.025136       | 37425               | 47050                             | 1.26                                    | Up                |
| sp Q14568 HS902_HUMAN | 0.049335       | 245250              | 309250                            | 1.26                                    | Up                |



|                       |          |       |        |      |    |
|-----------------------|----------|-------|--------|------|----|
| sp Q96QK1 VPS35_HUMAN | 0.045626 | 22300 | 28350  | 1.27 | Up |
| sp Q14194 DPYL1_HUMAN | 0.045244 | 29775 | 38525  | 1.29 | Up |
| sp P06865 HEXA_HUMAN  | 0.038395 | 32275 | 42100  | 1.30 | Up |
| sp Q5SSJ5 HP1B3_HUMAN | 0.040335 | 64825 | 85175  | 1.31 | Up |
| sp O15143 ARC1B_HUMAN | 0.019623 | 25650 | 34050  | 1.33 | Up |
| sp Q13867 BLMH_HUMAN  | 0.043999 | 36000 | 48025  | 1.33 | Up |
| sp Q9H9B4 SFXN1_HUMAN | 0.029645 | 29825 | 39950  | 1.34 | Up |
| sp P84103 SRSF3_HUMAN | 0.031289 | 51775 | 72625  | 1.40 | Up |
| sp P07686 HEXB_HUMAN  | 0.001014 | 34750 | 51825  | 1.49 | Up |
| sp Q96RU3 FNBP1_HUMAN | 0.00596  | 23975 | 36400  | 1.52 | Up |
| sp A6NEC2 PSAL_HUMAN  | 0.039362 | 22200 | 34200  | 1.54 | Up |
| sp O95399 UTS2_HUMAN  | 0.017679 | 94875 | 148250 | 1.56 | Up |
| sp Q9BWM7 SFXN3_HUMAN | 0.006165 | 48975 | 84550  | 1.73 | Up |
| sp Q13561 DCTN2_HUMAN | 0.001942 | 20600 | 40750  | 1.98 | Up |
| sp P35998 PRS7_HUMAN  | 0.021013 | 28900 | 69000  | 2.39 | Up |
| sp P38919 IF4A3_HUMAN | 0.03199  | 29025 | 75475  | 2.60 | Up |

SP: S protein; SP Perindopril (SP with ACE inhibitor)
